## Morphometry of newborn piglets and its relevance at weaning

Lucas M. Silva<sup>1</sup>, Pedro H. S. Fidelis<sup>1</sup>, Lígia V. L. Gomes<sup>1</sup>, Gleyson A. Santos<sup>1</sup>, Amanda M. A. Oliveira<sup>2</sup>, Elias S. Medeiros<sup>3</sup>, Marcelle S. Araújo<sup>1</sup> and Rennan H. R. Moreira\*<sup>1</sup>

<sup>1</sup>Departamento de Ciências Animais, Universidade Federal Rural do Semi-Árido, Mossoró, RN, 59.625-900, Brazil

<sup>2</sup>Departamento de Zootecnia, Universidade Federal do Ceará, Fortaleza, CE, 60020-181, Brazil

<sup>3</sup>Faculdade de Ciências Exatas e Tecnologia, Universidade Federal da Grande Dourados, MS, 79825-070, Brazil

\* Corresponding author: [rennan.moreira@ufersa.edu.br](mailto:rennan.moreira@ufersa.edu.br)

**Key words:** body mass index, ponderal index, surface-mass ratio, lactation, pig farming, ordinal regression

**Summary statement:** This manuscript demonstrates how morphometry can influence the development of animals, even with similar weights.

### Abstract

This study aimed to evaluate the development of suckling piglets using morphometric parameters. Different models were created to predict the probability to occur any of the three weight classes (light, medium, and heavy) based on the piglets' weaning weight. The variables in this research were birth weight ( $PW_B$ ), lactation length (Lac), and morphometric parameters— body length (BL), heart girth (HG), body mass index (BMI), ponderal index (PI), surface-mass ratio (SM), and birth order (BO). An adjustment of the ordinal regression was proposed to predict the weight classifications. The model with a significant effect of the Lac variables was selected. The light and heavy piglets, regardless of their morphometry, have a high chance of staying in the same weight class at weaning. However, this does not occur in medium piglets with diverse morphometry.

### Introduction

The genetic enhancement in hyperprolific sows has resulted in a significant increase in the number of piglets born by farrowing. As a consequence, piglets have

36 lower birth weight and/or greater weight variability between them. The limitation of  
37 space within the sows' uterus during gestation is one of the causes of this problem. This  
38 variability can have direct impacts on the mortality rate during the suckling period  
39 (Pinheiro and Dallanora, 2014). Usually, high mortality rates (11.5% to 18.6%) occur in  
40 the first seven days of life. The mortality of these piglets is one of the factors that reduce  
41 production on farms and jeopardize the financial performance (Aires et al., 2014).

42 Low birth weight is one of the main factors related to piglets' mortality.  
43 However, deaths can also be related to their morphometry, since litter quality is  
44 associated not only to weight but also uniformity. In this case, morphological  
45 differences between animals in the same weight range can lead to diverse developments.  
46 Therefore, besides the piglet's weight at birth, morphological characteristics (e.g., body  
47 mass index, ponderal index, surface-mass ratio) can be evaluation indicators for the  
48 positive performance of piglets in their successive life stages (Baxter et al., 2008, 2009).  
49 These indicators can be used to identify which animals will be below the average weight  
50 and potentially unprofitable early on (Huting et al., 2018).

51 The piglet's morphometry is directly linked to its thermoregulation and can have  
52 a great impact on its viability. According to Herpin et al. (2002), lighter piglets have  
53 bigger body surface in relation to their weight and are, therefore, more prone to  
54 hypothermia. However, piglets with similar weight may have body surfaces in different  
55 sizes (Hales et al., 2013). Sometimes this distinction can indicate animals that are more  
56 likely to survive and/or develop better. Therefore, it can be affirmed that piglets with  
57 better body mass index and ponderal index also have better growth rate, ability to  
58 compete for mammary glands, and survival capacity.

59 In modern pig farming, it is essential to select in advance which piglets need  
60 special conditions in a given period, and mathematical models contribute to these  
61 predictions. With reliable and validated models, it is possible to estimate the pigs'  
62 weight at slaughter and other zootechnical parameters (Silva et al., 2015). This study  
63 aimed to evaluate the development of suckling piglets based on their morphometry and  
64 determine the more accurate mathematical model to predict their weight class at  
65 weaning.

66

67 **Material and Methods**

68 The procedures performed during the experiment followed the guidelines  
69 determined by the Committee on Animal Research and Ethics of the Universidade  
70 Federal Rural do Semiárido (registered under protocol no. 22/2020).

71

#### 72 *Animals and Facilities*

73 The experiment was performed on 30 hyperprolific (two to six farrowing) swine  
74 matrices (TN70) in lactation at the commercial farm located in the municipality of  
75 Croatá de São Gonçalo do Amarante, Ceará, Brazil.

76 The matrices were transferred from the gestation facility to different maternity  
77 facilities after 105 days of gestation. The gestation facilities had individual cages and a  
78 solid (concrete) floor. The maternity facilities are made up of partially slatted floors  
79 with a heated creep for the piglets.

80

#### 81 *Evaluated parameters*

82 One day after farrowing, the size of the litter was standardized at 12 piglets. The  
83 cutting and healing of the umbilical cord were performed shortly after birth. On the  
84 third day after farrowing, the teeth were clipped and the tail cut. Seven-day-old piglets  
85 were castrated.

86 Piglets were identified and weighed individually one day after farrowing. They  
87 were weighed again and had their morphometric measures (body length – BL; heart  
88 girth - HG) collected at weaning (20-days-old), as per Figure 1. The birth and weaning  
89 weights were measured using a 3 decimal place balance.

90 The body length measurement started at the base of the ear going all the way  
91 until the first coccygeal vertebrae, following the midline suture of the cranium. Heart  
92 girth is the circumference measured right behind the forelimbs. Measurements were  
93 taken using a tape measure.

94 The body mass index (BMI) and ponderal index (PI) of all piglets were  
95 calculated based on their body length and birth weight (Amdi et al., 2013), as per the  
96 following equations:

97

$$BMI = \text{piglet weight (kg)} / [\text{piglet body length (m)}^2]$$

$$PI = \text{piglet weight (kg)} / [\text{piglet body length (m)}^3]$$

98

99 The correlation between the surface and mass (SM) was calculated using the  
100 formula proposed by Meeh (Brody et al., 1928):

101

$$S = KxW^{2/3}$$

102 Where:

103 S: body surface area (dm<sup>2</sup>);

104 K: 0.07;

105 W: body weight (kg).

106

$$SM = \text{piglet's body surface cm}^2 / \text{piglet's weight (kg)}$$

107

### 108 *Statistical analysis*

109 In order to carry out an initial investigation of the data set, an exploratory  
110 analysis based on position measures (minimum, average, median, and maximum) and  
111 measures of variability (standard deviation and quantiles) was proposed.

112 Three classes were defined based on the normal distribution of the piglets'  
113 weight at weaning ( $PW_w$ ): light (lighter than 3.967 kg), medium (3.967 to 5.095 kg),  
114 and heavy (heavier than 5.095 kg) piglets. Each class was determined with a 33.33%  
115 quartile. The average weight of the piglets was 4.531 kg (1.310 kg standard deviation),  
116 and the lactation length was  $19.63 \pm 1.41$  days.

117 Ordinal regression was used to set a model capable of predicting (probability)  
118 which weight class is expected for the piglet at weaning. The weaning weight class was  
119 the dependent variable. The independent variables were the piglets' birth weight ( $PW_B$ ),  
120 lactation length (Lac), and the morphometric parameters (BL, HG, BMI, PI, SM, and  
121 BO).

122 Based on the morphometric parameters and variables directly related to the  
123 piglet's weight at weaning, the adjustment and comparison of the following models were  
124 suggested:

125

$$\text{Model 1: } PW_w = PW_B + Lac + BL + HG + BO + \varepsilon$$

$$\text{Model 2: } PW_w = Lac + BMI + BO + \varepsilon$$

$$\text{Model 3: } PW_w = Lac + PI + BO + \varepsilon$$

$$\text{Model 4: } PW_w = Lac + SM + BO + \varepsilon$$

$$\text{Model 5: } PW_W = Lac + SM + \varepsilon$$

126

127         The models were verified by adjusting them according to the complete data set,  
128 which was divided into test data and training data.

129         1000 simple samples were extracted at random from 268 piglets for the training  
130 data, which represent 70% of the original data set (384 piglets). The remaining 116  
131 piglets (test data) were left out of the analysis in order to verify the performance of the  
132 prediction (probability of each weight class to occur). Afterwards, the results were  
133 compared to the real weight class of the piglet at weaning (Figure 2).

134         The most appropriate model was evaluated using a confusion matrix (Table 1),  
135 which establishes the correlation between the reference classes (observed weight  
136 classes) and the prediction (predicted weight classes for each model) by ordinal  
137 regression models. The “a” coefficient indicates the number of piglets that belonged to a  
138 reference class at weaning weight and that were correctly predicted to remain in the  
139 same class (reference = class and prediction = class). The “d” coefficient indicates the  
140 number of piglets that neither belong to the reference class nor were predicted to be in  
141 that class at weaning weight, which means a correct prediction by the model (reference  
142 = not class and prediction = not class). The “b” and “c” coefficients indicate the number  
143 of piglets incorrectly predicted by the models (reference = class and prediction = not  
144 class; reference = not class and prediction = class).

145         According to Jeune et al. (2018) and based on the confusion matrix, parameters  
146 to evaluate the accuracy of the models were obtained using sensitivity, precision, and  
147 Kappa’s values.

148         Sensitivity is the estimated probability (in percentage) of a correct  
149 prediction/result within the reference class (a/a+c) for each model. Precision is the  
150 likelihood that the model will provide correct results (a+d / a+b+c+d), which means that  
151 it is capable of predicting if the piglets will belong to a class when their reference is  
152 ‘class’ (same is true for ‘not class’). The value of Kappa can be classified as slight (0.00  
153 to 0.20), reasonable (0.21 to 0.40), moderate (0.41 to 0.60), substantial (0.61 to 0.80),  
154 and almost perfect (0.81 to 1.00), according to Landis and Koch (1977).

155         After selecting the best models in cross-validation and based on the accuracy  
156 parameters, a single model was chosen using the AIC and BIC values. The best model  
157 was the one with the lowest AIC and BIC values

158 Based on the model that best described the piglets' weight classes at weaning,  
159 the equations to obtain the probabilities of the piglet belonging to one of the three  
160 classes were presented.

161 All statistical analyses were performed using the R software (R Core Team,  
162 2020), *ggplot2* (Wickham, 2016), and *MASS* (Venables and Ripley, 2002).

163

## 164 **Results**

### 165 *Exploratory analysis*

166 The evaluated parameters did not present a normal distribution ( $P < 0.05$ ), except  
167 for the piglet weight ( $P > 0.05$ ; Table 2).

168

### 169 *Ordinal Regression*

170 The median values for sensitivity were 66.67, 31.93, and 69.39% in Model 1;  
171 68.29, 10.81, and 69.05% in Model 2; 64.86, 8.82, and 68.29% in Model 3; 65.88,  
172 31.43, and 71.79 in Model 4; and 65.85, 32.35, and 70.83% in Model 5 for the weight  
173 classes 1, 2, and 3, respectively (Figure 3).

174 Models 2, 4, and 5 presented better sensitivities. However, the maximum  
175 difference observed between all models was only 2.08 percentage points. The models  
176 presented reasonable Cohen's Kappa values, in which models 4 and 5 were higher than  
177 the other ones. In addition, both models had higher precision results in the evaluated set  
178 (Table 3).

179 Models 4 and 5 presented greater sensitivity, Kappa, and precision. However,  
180 when analyzing the accuracy of these models, the covariate birth order was not  
181 statistically significant ( $P > 0.05$ ) in Model 4. Thus, Model 5 was considered the best  
182 model to predict the probability of the piglets' weaning weight. Comparing the models  
183 with better accuracy and considering the significance of the parameters for each model,  
184 the values of AIC and BIC reinforce Model 5 as the most appropriate since it presented  
185 the lowest values for these parameters (Table 4).

186 Model 5 presented sensitivity results of 66.15% for the light class, 33.04% for  
187 medium, and 71.13% for heavy. It also had a Kappa value of 0.37 and precision of  
188 58.30% (Table 5).

189 The equations used to calculate the probabilities of belonging to any of the three  
190 classes are shown in Table 6.

191 Based on Model 5 and analyzing the parameters one at a time, it can be observed  
192 that as the value of the surface-mass ratio increases, the probability of the piglet  
193 belonging to the light class at weaning also increases. A different result is observed at  
194 the lactation length, in which older piglets have a higher probability of being in heavier  
195 classes at weaning (Figure 4).

196

## 197 **Discussion**

### 198 *Ordinal regression models*

199 The ordinal regression models allowed the identification of important variables  
200 at birth and also to estimate the weight classes of the piglets at weaning. Greater  
201 accuracy was observed in Model 5, which had significant results for the variables  
202 lactation length and surface-mass ratio. It is worth mentioning that these variables  
203 implicitly represent all other variables (BMI and PI) since surface-mass ratio (SM) is a  
204 response variable originated from implicit analytic parameters.

205 Birth order is directly related to the weight at weaning, and it influences the  
206 number of piglets born and their birth weight. However, this variable did not have a  
207 significant influence on the prediction of the tested models (Pineiro et al., 1996) and  
208 invalidated the models 1, 2, 3, and 4.

209 All models had low accuracy in predicting the weight of piglets at weaning in  
210 the medium weight class, which means that they have low sensitivity rates. Based on  
211 this information, it can be inferred that the morphometry of piglets with medium birth  
212 weight has a low influence on their weight at weaning. Therefore, these piglets may  
213 present different development. This is an important discovery, as it demonstrates the  
214 need to improve the conditions for fetal development, especially the sows' nutrition.  
215 Through nutrition, it is possible to modulate the development and improve the  
216 morphometry of piglets at birth. Thus, piglets born with medium weight remain in this  
217 class at weaning, or may even end up reaching the heavy class.

218 On the other hand, Model 5 showed a high sensitivity for the weight classes light  
219 and heavy, indicating that the morphometry has a strong influence on the weight of the  
220 piglets at weaning. If the piglets are born light or heavy, regardless of their  
221 morphometry, they are more likely to remain in their respective weight classes at  
222 weaning. Greater management, nutrition, and environmental conditions are necessary  
223 for light piglets, in order to reduce that their mortality rate during lactation and also to  
224 avoid the transmission of pathogens.

225 Model 5 was chosen because it has good sensitivity, reasonable Kappa, 58.3%  
226 precision, and lower AIC and BIC values. In addition, this model is easier to apply in  
227 farms, since lactation length and surface-mass ratio are parameters that are easy to  
228 measure. According to Pozza et al. (2008), the prediction models must have simple  
229 measurement parameters so they could be used in the field.

230

### 231 *Morphometric Parameters*

232 Birth weight is one of the main factors related to piglet survival. The lack of  
233 uniformity contributes to a higher occurrence of light piglets in the litter. Piglets that are  
234 light at birth have fewer energy reserves in their body and need more time to feed on  
235 their mother's milk (Panzardi et al., 2009). Therefore, they take longer to gain weight  
236 and, consequently, need more time to be weaned.

237 In addition to birth weight, the morphometry influences the development of  
238 piglets at weaning, in which those with a high surface-mass ratio are the ones most  
239 likely to belong to class 1. Light animals with a body that has a large surface area are  
240 more prone to suffer from cold temperatures (due to heat losses). Also, they are less  
241 competitive and more susceptible to mortality. Energy reserves and thermoregulation  
242 are relevant aspects in the early stages of life, and their deficiencies may compromise  
243 the piglet's development (Alonso-Spilsbury et al., 2007).

244 The early identification of animals with deformed morphometry is seen as an  
245 important strategy. This allows professionals to plan the most effective way to alleviate  
246 the problems arising from piglets with delayed intrauterine growth. The morphometric  
247 parameters used in the models are considered to be excellent predictors of the animal's  
248 development. In addition to indicating the piglets' ability to survive from their birth  
249 until weaning, morphometry can also be an important strategy for future development  
250 assessments (Litten et al., 2005).

251

### 252 **Conclusion**

253 Light and heavy piglets, regardless of their morphometry, have a high chance of  
254 staying in the same weight class at weaning. However, this does not occur in medium  
255 piglets with different morphometry.

256 Further studies should be carried out in order to improve the morphometry of  
257 light piglets, increasing their chances of survival and future development.



258 In addition to weight, the results indicate that morphometric parameters are  
259 fundamental to evaluate the development of piglets.

260

### 261 **Acknowledgment**

262 The authors want to acknowledge the Regina Farm and Marcus Vinícius  
263 Cardoso Trento.

264

### 265 **Competing Interest**

266 No competing interests declared.

267

### 268 **Funding**

269 The authors want to acknowledge the Conselho Nacional de Desenvolvimento  
270 Científico e Tecnológico (CNPq), the Instituto Nacional de Ciência e Tecnologia de  
271 Ciência Animal (INCT-CA/CNPq) and the Fundação de Apoio à Pesquisa do Estado do  
272 Rio Grande do Norte (FAPERN).

273

### 274 **References**

275 **Alonso-Spilsbury, M., Ramírez, R., Gonzalez-Lozano, M., Mota-Rojas, D. and**  
276 **Trujillo, M. E.** (2007). Piglet survival in early lactation: a review. *J. Anim. Vet. Adv.*  
277 **6(1)**, 76-86.

278

279 **Amdi, C., Krogh, U., Flummer, C., Oksbjerg, N., Hansen, C. F. and Theil, P. K.**  
280 (2013). Intrauterine growth restricted piglets defined by their head shape ingest  
281 insufficient amounts of colostrum. *J. Anim. Sci.* **91(12)**, 5605–5613. doi: 10.2527/  
282 jas.2013-6824.

283

284 **Aires, J. F., Metz, M., Birck, L. J., Hermann, A. I. and Oliveira, L.** (2014). Causas  
285 de mortalidade de leitões até o desmame em granja comercial na região noroeste do Rio  
286 Grande do Sul. Seminário de Iniciação Científica - Ciências Agrárias. UNIJUÍ.

287

288 **Baxter, E. M., Jarvis, S., D'eath, R. B., Ross, D. W., Robson, S. K., Farish, M.,**  
289 **Nevisonb, I. M, and Lawrence, A. B. and Edwards, S. A.** (2008). Investigating the  
290 behavioural and physiological indicators of neonatal survival in pigs. *Theriogenology.*  
291 **69(6)**, 773–783. doi: 10.1016/j.theriogenology.2007.12.007

292

293 **Brody, S., Comfort, J. E. and Mathews, J. S.** (1928). Further investigations on surface  
294 area with special reference to its significance in energy metabolism. In: Growth and  
295 development with special reference to domestic animals. Columbia, Missouri.  
296 University of Missouri College of Agriculture Agricultural Experiment Station  
297 Research Bulletin 115.

298

299 **Ferreira, R. A.** (2001). Avaliação da redução da proteína bruta da ração com  
300 suplementação de aminoácidos para suínos dos 15 aos 60 kg mantidos em diferentes  
301 ambientes térmicos. *67 f. Tese (Doutorado em Zootecnia)*. Universidade Federal de  
302 Viçosa. Viçosa.

303

304 **Hales, J., Moustsen, V. A., Nielsen, M. B. F., and Hansen, C. F.** (2013). Individual  
305 physical characteristics of neonatal piglets affect preweaning survival of piglets born in  
306 a noncrated system. *J. Anim. Sci.* **91**(10), 4991–5003. doi: 10.2527/jas.2012-5740

307

308 **Herpin P., Damon M. and Le Dividich J.** (2002). Development of thermoregulation  
309 and neonatal survival in pigs. *Livest. Prod. Sci.* **78**, 25–45. doi: 10.1016/S0301-  
310 6226(02)00183-5

311

312 **Huting, A. M. S., Sakkas, P., Wellock, I., Almond, K., and Kyriazakis, I.** (2018).  
313 Once small always small? To what extent morphometric characteristics and post-  
314 weaning starter regime affect pig lifetime growth performance. *Porc. Health Manag.*  
315 **4**(1), 21–35. doi: 10.1186/s40813-018-0098-1

316

317 **Panzardi, A., Marques, B. M. F. P. P., Heim, G., Bortolozzo, F.P. and Wentz, I.**  
318 (2009). Fatores que influenciam o peso do leitão ao nascimento. *Acta Sci. Vet.* **37**(1),  
319 49-60.

320

321 **Pinheiro, R. and Dallanora, D.** (2014). Produção de suínos: teoria e prática. Brasília,  
322 DF. Associação Brasileira de Criadores de Suínos.

323

- 324 **Jeune, W., Francelino, M. R., Souza, E. D., Fernandes Filho, E. I. and Rocha, G. C.**  
325 (2018). Multinomial logistic regression and random forest classifiers in digital mapping  
326 of soil classes in western Haiti. *Rev. Bras. Ciênc. Solo.* **42**, e0170133 - e0170153.  
327
- 328 **Landis, J. R. and Koch, G. G.** (1977). The measurement of observer agreement for  
329 categorical data. *Biometrics*, **33**, 159-174. doi: 10.2307/2529310  
330
- 331 **Litten, J. C., Perkins, K. S., Laws, J., Corson, A. M. and Clarke, L.** (2005). The  
332 effect of ponderal index on plasma concentration of insulin-like growth factor-1 (IGF-1)  
333 on neonatal pigs. *Early Nutr Its Later Consequences: New Oppor.* 569, 193–194. doi:  
334 10.1007/1-4020-3535-7\_42  
335
- 336 **Pinheiro, M. J. P., Galvão, R. J. D., Barbosa Neto, F. et al.** (1996). Características  
337 reprodutivas de suínos puros na região Semi-Árida do Rio Grande do Norte. II. Pesos de  
338 leitões e leitegadas. In: *Reunião Anual da Sociedade Brasileira de Zootecnia*, 33, 1996,  
339 Fortaleza. Anais... Fortaleza: SBZ, 1, 407-409.  
340
- 341 **Pozza, P. C., Gomes, P. C., Donzele, J. L., Rostagno, H. S., Pozza, M. S. S. and**  
342 **Nunes, R.V.** (2008). Composição química, digestibilidade e predição dos valores  
343 energéticos da farinha de carne e ossos para suínos. *Acta Sci. Anim. Sci.* **30(1)**, 33-40.  
344 doi: 10.4025/actascianimsci.v30i1.3597  
345
- 346 **R Core Team.** (2020). R: A language and environment for statistical computing. R  
347 Foundation for Statistical Computing, Vienna, Austria. URL [https://www.R-](https://www.R-project.org/)  
348 [project.org/](https://www.R-project.org/).  
349
- 350 **Silva, C.A., Agostini, P.S. and Gasa, J.** (2015). Uso de modelos matemáticos para  
351 analisar a influência de fatores de produção sobre a mortalidade e desempenho de  
352 suínos de terminação. In: Barcellos, D.E.; Bortolozzo, F.P.; Wentz, I.; Bernardi, M.L.  
353 (Ed.). *Avanços em sanidade, produção e reprodução de suínos*. Porto Alegre:  
354 Universidade Federal do Rio Grande do Sul, Setor de Suínos, 267-284.  
355
- 356 **Venables, W. N. and Ripley, B. D.** (2002) *Modern Applied Statistics with S*. Fourth  
357 Edition. Springer, New York. ISBN 0-387-95457-0.

358

359 **Wickham, H.** (2016). *ggplot2: Elegant Graphics for Data Analysis*. Springer-Verlag  
360 New York.

361

362 **Figures**

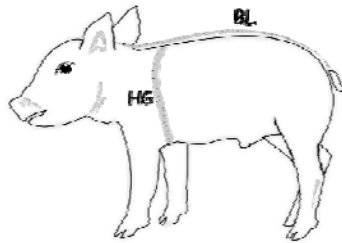

363

364 **Fig. 1. Piglet's morphometric parameters: body length and heart girth (adapted**  
365 **from Dreamstime, 2020).** (body length – BL; heart girth - HG).

366

367

368

369

370

371

372

373

374

375

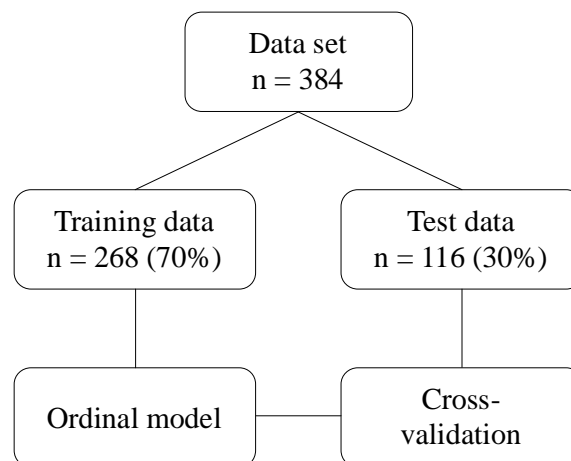

376

**Fig. 2. Flowchart of the adjustment in the ordinal regression model.**

377

378

379

380

381

382

383

384

385

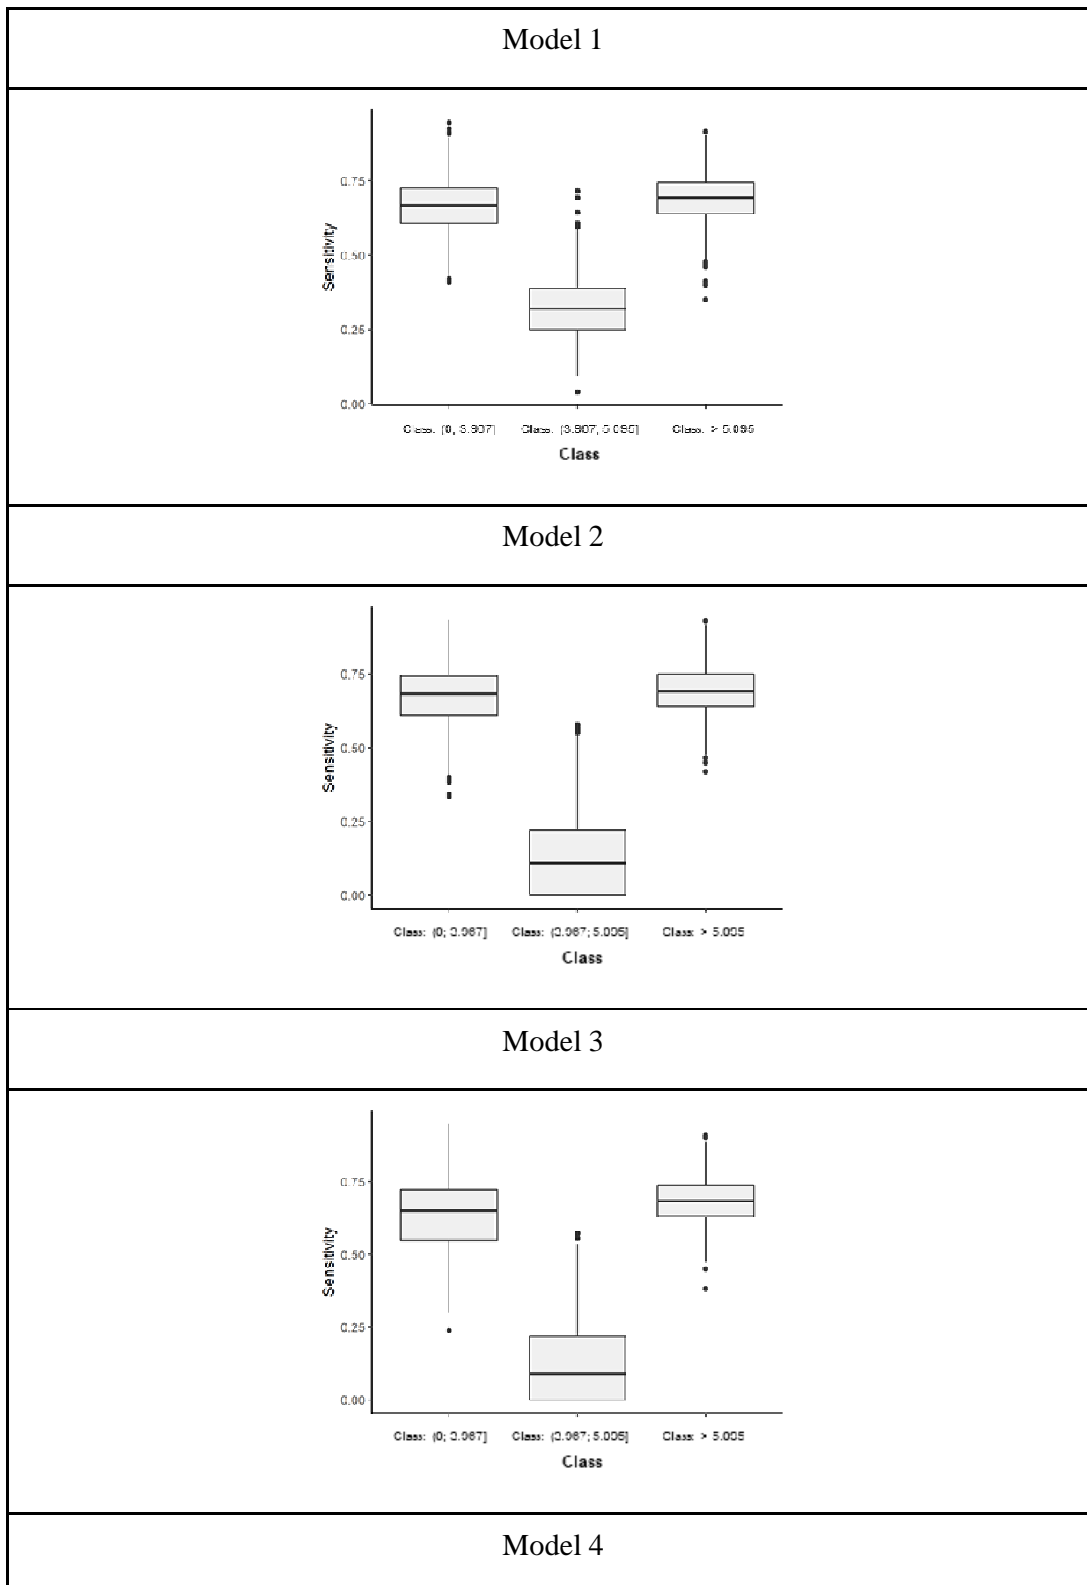

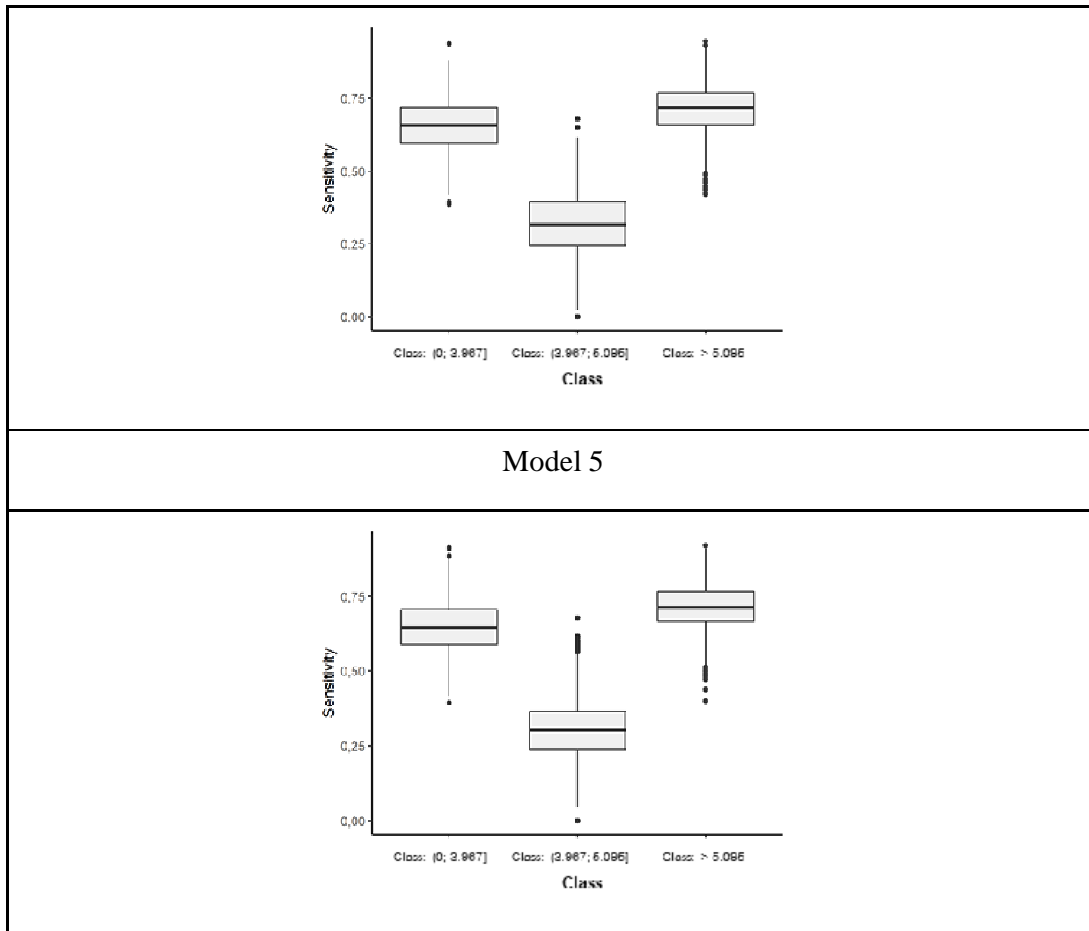

386 **Fig. 3. Evaluation of the performance of each model through cross-validation,**  
387 **represented by a box plot.**

388

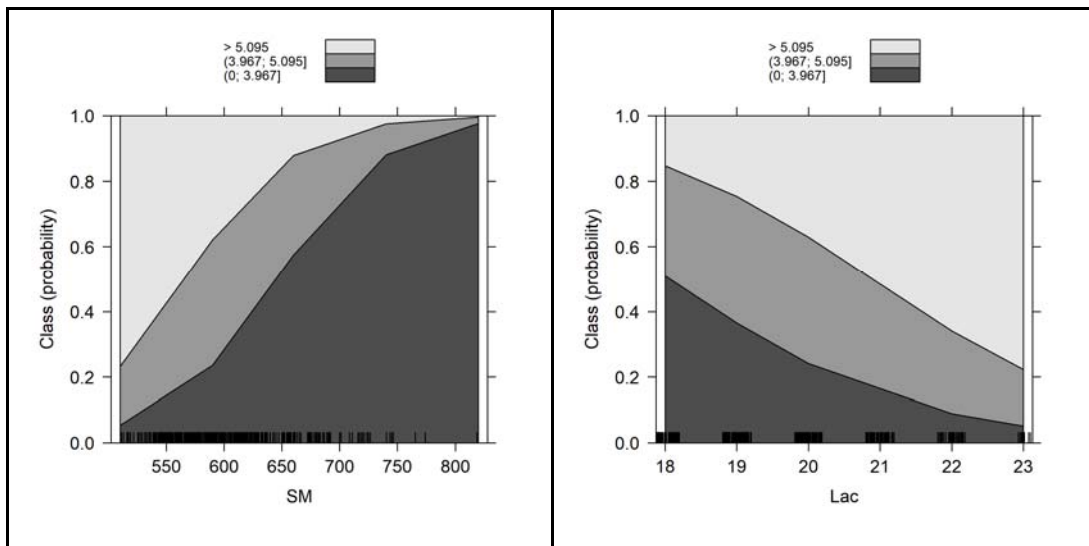

389 **Figure 4. Probabilities of the piglets belonging to any weight class in each parameter**  
390 **(surface-mass ratio – SM; and lactation length – Lac) of Model 5.**

391 **Table 1.** Confusion matrix used to adjust the ordinal regression

| Prediction | Reference |           | Total   |
|------------|-----------|-----------|---------|
|            | Class     | Not class |         |
| Class      | a         | b         | a+b     |
| Not class  | c         | d         | c+d     |
| Total      | a+c       | b+d       | a+b+c+d |

392 Class: number of weaning piglets belonging to one of the classes (light, medium, and heavy).

393 Not class: number of weaning piglets not belonging to one of the classes (light, medium, and heavy).

394

395 **Table 2.** Descriptive statistics of the variables under study.

| Variables       | Average | Standard Deviation | Minimum | PCTL (25%) | Median | PCTL (75%) | Maximum  | p-SW   |
|-----------------|---------|--------------------|---------|------------|--------|------------|----------|--------|
| PW <sub>B</sub> | 1.636   | 0.378              | 0.625   | 1.385      | 1.658  | 1.891      | 2.575    | 0.438  |
| PW <sub>w</sub> | 4.531   | 1.310              | 1.000   | 3.500      | 4.600  | 5.500      | 8.000    | 0.012  |
| BL              | 26.79   | 2.40               | 19.00   | 25.00      | 27.00  | 29.00      | 32.00    | <0.001 |
| HG              | 26.04   | 2.27               | 17.00   | 25.00      | 26.00  | 28.00      | 31.00    | <0.001 |
| BMI             | 22.57   | 3.40               | 13.65   | 20.44      | 22.34  | 24.10      | 40.48    | <0.001 |
| PI              | 84.82   | 14.74              | 47.77   | 76.02      | 82.68  | 91.66      | 192.74   | <0.001 |
| BSA             | 965.89  | 152.16             | 511.70  | 869.76     | 980.39 | 1,070.53   | 1,315.07 | 0.044  |
| SM              | 601.98  | 51.61              | 510.71  | 566.04     | 591.49 | 627.98     | 818.72   | <0.001 |
| Lac             | 19.63   | 1.41               | 18.00   | 19.00      | 19.00  | 21.00      | 23.00    | <0.001 |
| BO              | 2.70    | 1.49               | 1.00    | 1.00       | 2.00   | 3.20       | 6.00     | <0.001 |

396 PW<sub>B</sub>: piglet's birth weight; PW<sub>w</sub>: piglet's weaning weight; BL: body length; HG: heart  
 397 girth; BMI: body mass index; PI: ponderal index; BSA: body surface area; SM: surface-  
 398 mass ratio; Lac: lactation length; BO: birth order.

399

400

401

402 **Table 3.** Median values obtained in the statistics analysis (sensitivity, Kappa, and  
 403 precision) performed to evaluate the performance of each model through the cross-  
 404 validation of the test set.

|             | <b>Model 1</b> | <b>Model 2</b> | <b>Model 3</b> | <b>Model 4</b> | <b>Model 5</b> |
|-------------|----------------|----------------|----------------|----------------|----------------|
| Sensitivity | 61.90%         | 62.50%         | 60.42%         | 62.50%         | 62.50%         |
| Kappa       | 35.22%         | 26.53%         | 23.80%         | 35.64%         | 35.90%         |
| Precision   | 56.90%         | 51.72%         | 50.00%         | 57.76%         | 57.76%         |

405 Model 1:  $PW_w = PW_B + Lac + BL + HG + BO + \varepsilon$ ;

406 Model 2:  $PW_w = Lac + BMI + BO + \varepsilon$ ;

407 Model 3:  $PW_w = Lac + PI + BO + \varepsilon$ ;

408 Model 4:  $PW_w = Lac + SM + BO + \varepsilon$ ;

409 Model 5:  $PW_w = Lac + SM + \varepsilon$ .

410

411 **Table 4.** Analysis of variance for the classification of weaning weight in Model 4.

| <b>Parameter</b> | <b>AIC</b> | <b>BIC</b> | <b>LR Chisq</b> | <b>Pr (&gt;Chisq)</b> |
|------------------|------------|------------|-----------------|-----------------------|
| Model 4          | 690.226    | 709.979    |                 |                       |
| Lac              |            |            | 52.172          | <0.001                |
| SM               |            |            | 80.489          | <0.001                |
| BO               |            |            | 0.517           | 0.472                 |
| Model 5          | 688.743    | 704.546    |                 |                       |
| Lac              |            |            | 55.675          | <0.001                |
| SM               |            |            | 83.320          | <0.001                |

412 Lac: lactation length; SM: surface-mass ratio; BO: birth order.

413

414 **Table 5.** Confusion matrix of the classification piglet's weaning weight ( $PW_w$ )  
 415 developed using ordinal logistic regression – Model 5.

| <b>Expected</b> | <b>Reference</b> |                  |         | <b>Total</b> |
|-----------------|------------------|------------------|---------|--------------|
|                 | (0 to 3.967]     | (3.967 to 5.095] | > 5.095 |              |
| (0 to 3.967]    | 86               | 37               | 13      | 136          |
| (3967 to 5.095] | 23               | 37               | 28      | 88           |
| > 5.095         | 21               | 38               | 101     | 160          |
| <b>Total</b>    | 130              | 112              | 142     | 384          |

416

417



418 **Table 6.** Probability estimates for each weight class in Model 5

| Class  | Probability                                                                   |
|--------|-------------------------------------------------------------------------------|
| Light  | $P_1 = \frac{1}{1 + e^{-2.018 - (0.593 \times Lac - 0.021 \times SM)}}$       |
| Medium | $P_2 = \frac{1}{1 + e^{-0.346 - (0.593 \times Lac - 0.021 \times SM)}} - P_1$ |
| Heavy  | $P_3 = 1 - P_2 - P_1$                                                         |

419
